# Supplementary material
Source: publisher site journal article supplement (https://www.dovepress.com/article/supplementary_file/622224/622224%20Revised%20Supplementary%20File.docx)
Supplement: Supplementary file 1 [file 622224%20Revised%20Supplementary%20File.docx]

# **Supplementary Table 1. Comparison of laboratory parameters according to treatment status**

| Parameter | MPH (n) | Mean ± SD | Treatmen naive (n) | Mean ± SD | MW p | FDR q |
| --- | --- | --- | --- | --- | --- | --- |
| Age (months) | 32 | 122.91 ± 27.26 | 40 | 101.23 ± 25.87 | 0.0007 | 0.033 |
| WBC | 32 | 8.57 ± 2.11 | 40 | 8.88 ± 2.48 | 0.520 | 0.820 |
| Hemoglobin | 32 | 13.07 ± 1.05 | 40 | 12.98 ± 1.18 | 0.664 | 0.861 |
| Hematocrit | 32 | 38.69 ± 2.83 | 40 | 38.44 ± 3.14 | 0.687 | 0.861 |
| MCV | 32 | 81.59 ± 4.22 | 40 | 81.44 ± 4.07 | 0.804 | 0.910 |
| MCH | 32 | 27.59 ± 1.51 | 40 | 27.44 ± 1.47 | 0.601 | 0.861 |
| MCHC | 32 | 33.86 ± 0.81 | 40 | 33.70 ± 0.86 | 0.410 | 0.820 |
| RDW | 32 | 13.38 ± 1.09 | 40 | 13.54 ± 1.11 | 0.563 | 0.820 |
| PLT | 32 | 297.22 ± 73.40 | 40 | 305.10 ± 69.91 | 0.488 | 0.820 |
| MPV | 32 | 9.98 ± 0.96 | 40 | 9.59 ± 1.03 | 0.047 | 0.530 |
| Ferritin | 29 | 31.85 ± 23.49 | 36 | 38.72 ± 27.63 | 0.348 | 0.820 |
| Iron (Fe) | 30 | 78.93 ± 33.02 | 38 | 88.42 ± 36.40 | 0.290 | 0.820 |
| TIBC | 29 | 355.40 ± 55.32 | 36 | 347.11 ± 62.88 | 0.524 | 0.820 |
| AST | 31 | 24.35 ± 8.44 | 39 | 28.67 ± 11.36 | 0.037 | 0.530 |
| ALT | 31 | 18.90 ± 9.11 | 39 | 20.21 ± 10.67 | 0.508 | 0.820 |
| Creatinine | 32 | 0.58 ± 0.12 | 40 | 0.63 ± 0.14 | 0.011 | 0.290 |
| TSH | 30 | 2.28 ± 1.15 | 37 | 2.41 ± 1.32 | 0.671 | 0.861 |
| Free T4 | 30 | 1.17 ± 0.18 | 37 | 1.14 ± 0.19 | 0.429 | 0.820 |
| Total Cholesterol | 30 | 160.47 ± 28.34 | 38 | 164.52 ± 32.77 | 0.589 | 0.861 |
| HDL | 30 | 49.63 ± 9.17 | 38 | 51.28 ± 10.25 | 0.471 | 0.820 |
| LDL | 30 | 94.81 ± 23.61 | 38 | 98.07 ± 26.94 | 0.544 | 0.820 |
| Triglycerides | 30 | 82.44 ± 37.50 | 38 | 86.90 ± 41.68 | 0.601 | 0.861 |
| CRP | 29 | 0.54 ± 0.61 | 35 | 0.63 ± 0.74 | 0.482 | 0.820 |
| CK | 29 | 126.44 ± 62.13 | 35 | 139.05 ± 70.21 | 0.365 | 0.820 |
| GDF-15 | 32 | 269.99 ± 161.75 | 40 | 282.32 ± 135.54 | 0.533 | 0.820 |

Data are presented as mean ± SD. Only parameters available in more than 40 participants were included. Group comparisons were performed using the Mann–Whitney U test. Multiple comparisons were controlled using the Benjamini–Hochberg false discovery rate (FDR) correction.
